# Supplementary material
Source: publisher site journal article supplement (https://www.dovepress.com/article/406208)
Supplement: Supplementary file 1 [file get_supplementary_file.php]

**Table S1. Multinomial logistic regression, associations with COPD and PRISm compared with individuals with normal spirometry**

|  | **Coefficient** | **95%CI** | **Conf.** | **P-value** |
| --- | --- | --- | --- | --- |
| **COPD** | |  |  |  |
| Age, yrs | 0.08 | 0.07 | 0.09 | <0.001 |
| Men/women | 0.75 | 0.51 | 0.99 | <0.001 |
| BMI, (kg/m2) | -0.04 | -0.06 | -0.01 | <0.001 |
| Current smoking | 0.76 | 0.49 | 1.02 | <0.001 |
| Asthma | 0.58 | 0.26 | 0.91 | <0.001 |
| Previous diagnosis of COPD | 0.72 | 0.25 | 1.18 | <0.001 |
| Cough or phlegm | 0.24 | 0.00 | 0.48 | 0.05 |
| Use of respiratory medication | 0.31 | -0.01 | 0.63 | 0.06 |
| Missing days of work last year | 0.08 | 0.01 | 0.15 | 0.02 |
| Pack-years smoking | 0.01 | 0.00 | 0.02 | <0.001 |
| Wheezing last year | 0.68 | 0.42 | 0.95 | <0.001 |
| Diabetes | -0.25 | -0.64 | 0.15 | 0.23 |
| Years at school | -0.02 | -0.04 | 0.01 | 0.19 |
| Heart disease | -0.28 | -0.59 | 0.03 | 0.07 |
| Previous tuberculosis | 0.51 | 0.00 | 1.03 | 0.05 |
| Lung cancer | 1.97 | 0.28 | 3.65 | 0.02 |
| Constant | -6.09 | -7.11 | -5.07 | <0.001 |
| **PRISm** |  |  |  |  |
| Age, yrs | 0.01 | 0.00 | 0.03 | 0.15 |
| Men/women | 0.16 | -0.22 | 0.55 | 0.40 |
| Current smoking | 0.23 | -0.17 | 0.64 | 0.26 |
| Asthma | 0.25 | -0.26 | 0.77 | 0.34 |
| Previous diagnosis of COPD | 0.66 | -0.04 | 1.35 | 0.07 |
| Missing days of work last year | 0.08 | 0.01 | 0.15 | 0.02 |
| Wheezing | 0.63 | 0.23 | 1.03 | <0.001 |
| Years at school | -0.05 | -0.09 | -0.01 | 0.02 |
| Tuberculosis | 0.63 | -0.15 | 1.41 | 0.11 |
| Dyspnea MRC >1 | 0.33 | -0.06 | 0.72 | 0.10 |
| Constant | -3.72 | -5.20 | -2.24 | <0.001 |

Definitions: BMI=body mass index.

Criteria for COPD were an FEV1/FVC<0.7 post-BD and for PRISm, an FEV1/FVC≥0.70 and an FEV1<80%. The table depicts variables with a P<0.15. Self-perception of good health was not significant. n=2896, Pseudo R2= 0.1465

**Table S2. Predictors of transitions into the different lung function categories**

| **Normal/PRISm to COPD** | | |
| --- | --- | --- |
| Variable | OR | 95% CI |
| Closeness of FEV1 /FVC to 0.70* | 18 | 9.70-36.0 |
| Age | 1.05 | 1.03-1.08 |
| Current smoking | 2.0 | 1.20-3.20 |
| Self-assessment of good health | 0.52 | 0.33-0.85 |
| Longer FET in the second evaluation than in the first | 0.69 | 0.65-0.73 |

*** Difference between FEV1/FVC and 0.70 (the threshold).** Exacerbation was a self-reported deterioration of breathing symptoms that affected usual daily activities or caused missed work.
